# Supplementary material
Source: publisher figshare collection journal article supplement (https://acs.figshare.com/ndownloader/files/4302667)
Supplement: Supplementary file 1 [file 4302667]

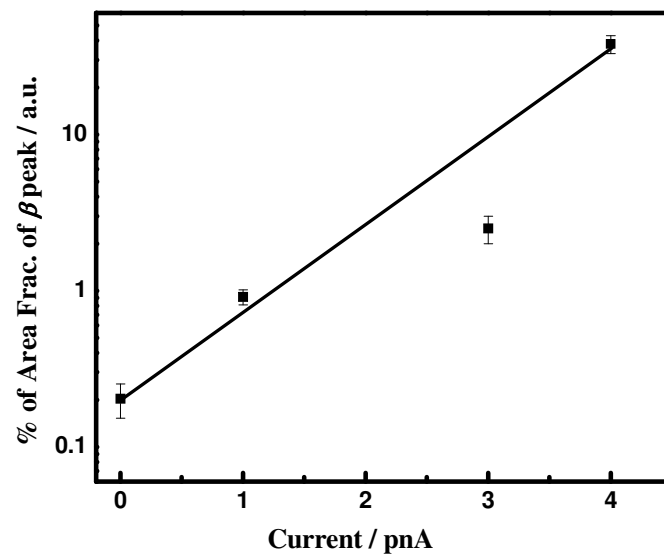

**Figure S1:** Percentage of area fraction of  $\beta$  peak as a function of beam current evaluated from the respective peak area given in figure 1 (b).

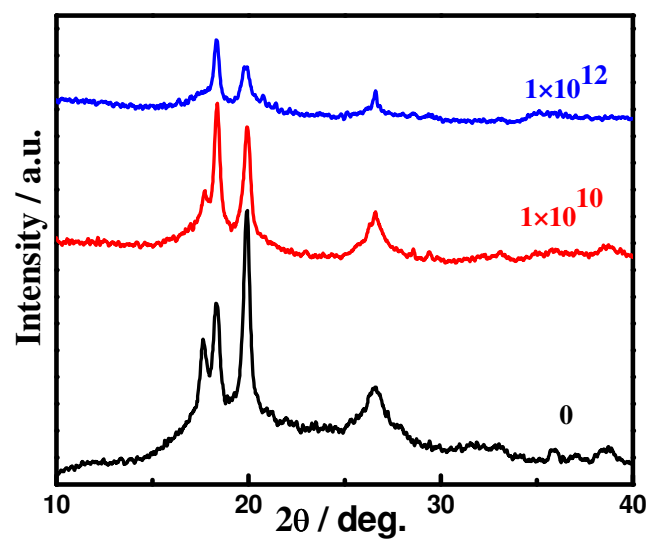

**Figure S2:** XRD patterns of pure PVDF and irradiated PVDF at different fluences having 0.5 pA beam current. The number “0” indicates the zero fluence.
